# Supplementary material for: Allergies and risk of colorectal cancer: a systematic review and meta-analysis of observational studies
Source: PubMed Central journal article supplement (PMC5362432; doi:10.18632/oncotarget.14599), 2017-01-11
Supplement: oncotarget-08-14646-s001.pdf [file oncotarget-08-14646-s001.pdf]

## Allergies and risk of colorectal cancer: a systematic review and meta-analysis of observational studies

### Supplementary Materials

#### Supplementary Table S1: Detailed search strategy for pubmed

1. "Allergy and Immunology" [Mesh]
2. "Asthma" [Mesh]
3. "Allergens" [Mesh]
4. "Rhinitis, Allergic, Seasonal" [Mesh]
5. (Allerg\* OR Hypersensitivit\* OR Asthma\* OR atopy OR 'hay fever' OR hayfever) [Title/Abstract]
6. 1 OR 2 OR 3 OR 4 OR 5
7. "Colorectal Neoplasms" [Mesh]
8. "Colonic Neoplasms" [Mesh]
9. "Rectal Neoplasms" [Mesh]
10. (((colorect\*[Title/Abstract]) OR colon\*[Title/Abstract]) OR rectum [Title/Abstract]) OR rectal [Title/Abstract]
11. (((((((cancer\*[Title/Abstract]) OR tumor\*[Title/Abstract]) OR tumour\*[Title/Abstract]) OR carcinom\*[Title/Abstract]) OR neoplas\*[Title/Abstract]) OR adenocarcinoma\*[Title/Abstract]) OR malignan\*[Title/Abstract])
12. 10 AND 11
13. 7 OR 8 OR 9 OR 12
14. 6 AND 13

#### Supplementary Table S2: Detailed search strategy for embase

1. "allergy"/exp
2. 'atopy'/exp
3. 'pollen allergy'/exp
4. 1 OR 2 OR 3
5. (Allerg\* OR Hypersensitivit\* OR Asthma\* OR atopy OR 'hay fever' OR hayfever) :ab,ti
6. 4 OR 5
7. 'colorectal cancer'/exp
8. 'colon cancer'/exp
9. 'rectum cancer'/exp
10. ((colorect\* OR colon\* OR rectum OR rectal) and (cancer\* OR tumor\* OR tumour\* OR carcinom\* OR neoplas\* OR adenocarcinoma\* OR malignan\*)):ab,ti
11. 7 OR 8 OR 9 OR 10
12. 6 AND 11

**Supplementary Table S3: Methodological quality of included studies based on the Newcastle–Ottawa scale for cohort studies**

| <b>Observational studies<sup>a</sup></b> |               |                  |                      |                         |                                |
|------------------------------------------|---------------|------------------|----------------------|-------------------------|--------------------------------|
| <b>Study</b>                             | <b>Design</b> | <b>Selection</b> | <b>Comparability</b> | <b>Outcome/exposure</b> | <b>Overall quality (max 9)</b> |
| Tambe NA et al. 2015                     | Cohort        | ★★★              | ★★                   | ★★                      | 7                              |
| Hemminki K et al. 2014                   | Cohort        | ★★★★             |                      | ★★                      | 6                              |
| Skaaby T et al. 2014                     | Cohort        | ★★★★             | ★                    | ★★                      | 7                              |
| Jacobs EJ et al. 2013                    | Cohort        | ★★★              | ★★                   | ★★★★                    | 8                              |
| Chae YK et al. 2012                      | Cohort        | ★★★              | ★★                   | ★★                      | 7                              |
| Ji J et al. 2009                         | Cohort        | ★★★★             |                      | ★★                      | 6                              |
| Prizment AE et al. 2007                  | Cohort        | ★★               | ★★                   | ★★★★                    | 7                              |
| Talbot-Smith A et al. 2002               | Cohort        | ★★★              | ★                    | ★★★★                    | 7                              |
| Vesterinen E et al. 1993                 | Cohort        | ★★★★             | ★                    | ★★                      | 7                              |

<sup>a</sup>Study quality assessment of observational studies performed using the Newcastle–Ottawa scale (each asterisk represents if individual criterion within the subsection were fulfilled).

**Supplementary Table S4: PRISMA 2009 Checklist.** See Supplementary\_Table\_S4
